# Supplementary material for: Synthesis and characterization of multifunctional CdTe/Fe2O3@SiO2 core/shell nanosensors for Hg2+ ions detection
Source: Royal Society of Chemistry journal article supplement (doi:10.1039/c0nj00393j), 2010-01-01
Supplement: c0nj00393j.pdf [file c0nj00393j.pdf]

**Supporting Information**

**Synthesis and characterization of multifunctional**

**CdTe/Fe<sub>2</sub>O<sub>3</sub>@SiO<sub>2</sub> core/shell**

**nanosensors for Hg<sup>2+</sup> ions detection**

Hengguo Wang<sup>1</sup>, Yapeng Li<sup>1</sup>, Xiaoliang Fei<sup>1</sup>, Lei Sun<sup>1</sup>, Ligong Zhang<sup>2</sup>, Zhenzhong Zhang<sup>2</sup>, Yue Zhang<sup>1</sup>, Yaoxian Li<sup>1</sup>, Qingbiao Yang<sup>1\*</sup>

<sup>1</sup> Department of Chemistry, Jilin University, Changchun, 130021, People's Republic of China

<sup>2</sup> Key Laboratory of Excited State Processes, Changchun Institute of Optics, Fine Mechanics and Physics, Chinese Academy of Sciences, Changchun, 130033, P. R. China.

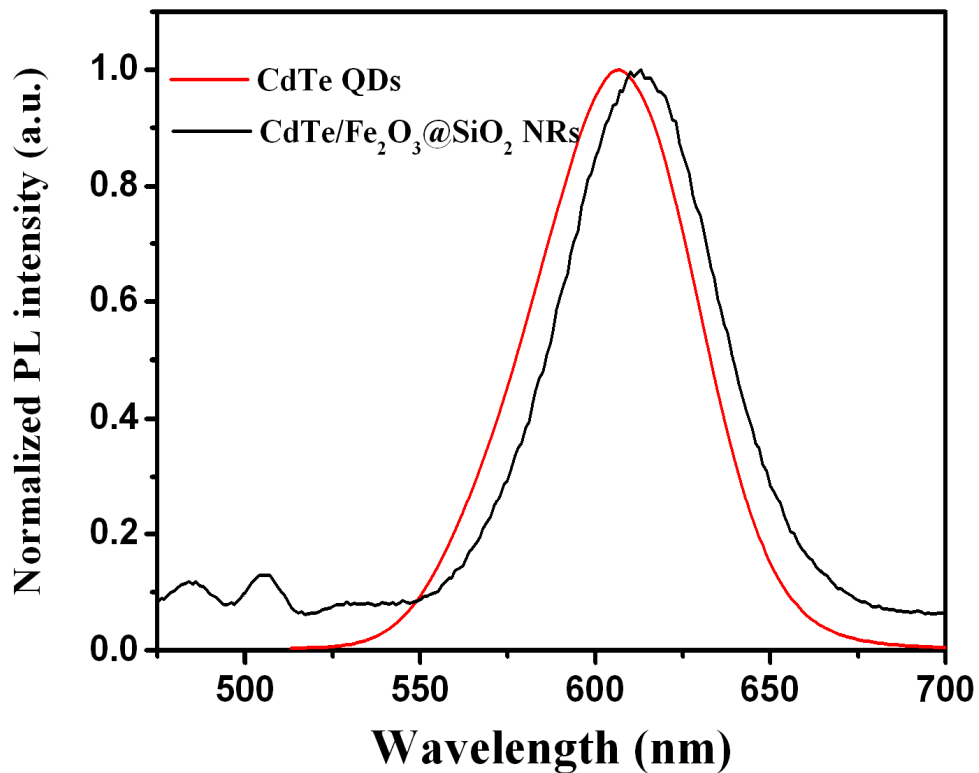

**Figure. S1** PL spectra of CdTe QDs (606 nm) and CdTe/Fe<sub>2</sub>O<sub>3</sub>@SiO<sub>2</sub> core/shell nanostructures (612 nm) under excitation of 370 nm.

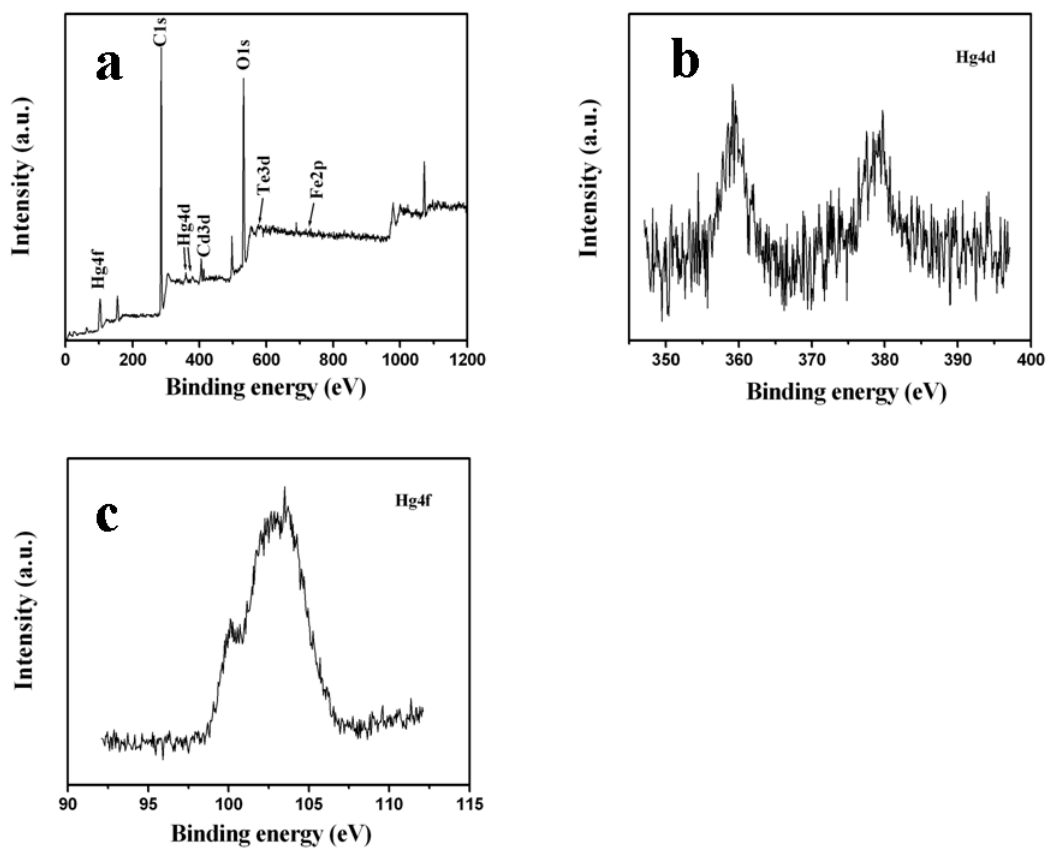

**Figure. S2** XPS fully scanned spectra (a), XPS spectra of Hg4d (b) and Hg 4f (c) from CdTe/Fe<sub>2</sub>O<sub>3</sub>@SiO<sub>2</sub> nanocomposites exposed to Hg<sup>2+</sup> ions.

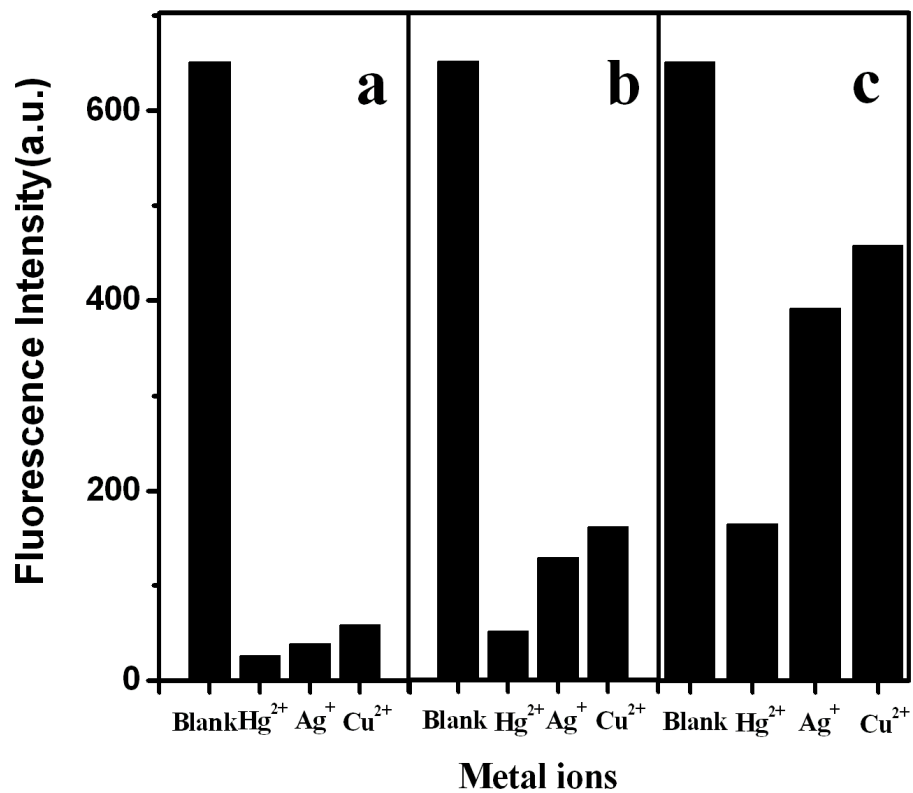

**Figure. S3** Fluorescence response of CdTe/Fe<sub>2</sub>O<sub>3</sub>@SiO<sub>2</sub> core/shell nanosensor in buffered (NaAc-HAc, pH = 7) solution upon different concentrations of metal cations (a 1 mM, b 0.1 mM, c 0.01 mM) with an excitation at 370 nm.
